# Supplementary material for: Glycan Analysis as Biomarkers for Testicular Cancer
Source: MDPI journal article supplement (doi:10.3390/diagnostics9040156), 2019-10-22
Supplement: s1 [file s1]

| trophoblastic cancers |                                     | TGCT vs ChCp | TGCT vs ChCd | TGCT vs OGCC |
|-----------------------|-------------------------------------|--------------|--------------|--------------|
|                       |                                     | AUC          | AUC          | AUC          |
| 1                     | hCG                                 | 1            | 0,894        | 0,667        |
| 2                     | hCG-H                               | 1            | 0,909        | 0,667        |
| 3                     | hCG-H% ( <b>line3 / line2</b> )     | 0,546        | 1            | 0,722        |
| 4                     | hCGβ                                | 0,889        | 0,727        | 0,583        |
| 5                     | hCGβ% ( <b>line4 / line2</b> )      | 0,593        | 0,636        | 0,556        |
| 6                     | hCG + hCG-H                         | 1            | 1            | 0,778        |
| 7                     | hCG + hCG-H%                        | 1            | 1            | 0,806        |
| 8                     | hCG + hCGβ                          | 1            | 0,924        | 0,722        |
| 9                     | hCG + hCGβ%                         | 1            | 0,924        | 0,722        |
| 10                    | hCG-H + hCG-H%                      | 1            | 1            | 0,806        |
| 11                    | hCG-H + hCGβ                        | 1            | 0,924        | 0,667        |
| 12                    | hCG-H + hCGβ%                       | 1            | 0,924        | 0,722        |
| 13                    | hCG-H% + hCGβ                       | 0,907        | 1            | 0,833        |
| 14                    | hCG-H% + hCGβ%                      | 0,704        | 1            | 0,778        |
| 15                    | hCGβ + hCGβ%                        | 1            | 0,894        | 0,611        |
| 16                    | hCG + hCG-H + hCG-H%                | 1            | 1            | 0,833        |
| 17                    | hCG + hCG-H + hCGβ                  | 1            | 1            | 0,861        |
| 18                    | hCG + hCG-H + hCGβ%                 | 1            | 1            | 0,889        |
| 19                    | hCG + hCG-H% + hCGβ                 | 1            | 1            | 0,833        |
| 20                    | hCG + hCG-H % + hCGb %              | 1            | 1            | 0,833        |
| 21                    | hCG + hCGβ + hCGβ%                  | 0,667        | 0,924        | 0,694        |
| 22                    | hCG-H + hCG-H% + hCGβ               | 1            | 1            | 0,833        |
| 23                    | hCG-H + hCG-H% + hCGβ%              | 1            | 1            | 0,833        |
| 24                    | hCG-H + hCGβ + hCGβ%                | 1            | 0,924        | 0,639        |
| 25                    | hCG-H% + hCGβ + hCGβ%               | 1            | 1            | 0,833        |
| 26                    | hCG + hCG-H + hCG-H% + hCGβ         | 1            | 1            | 0,889        |
| 27                    | hCG + hCG-H + hCG-H% + hCGβ%        | 1            | 1            | 0,889        |
| 28                    | hCG + hCG-H + hCGβ + hCGβ%          | 1            | 1            | 0,861        |
| 29                    | hCG + hCG-H% + hCGβ + hCGβ%         | 1            | 1            | 0,861        |
| 30                    | hCG-H + hCG-H% + hCGβ + hCGβ%       | 1            | 1            | 0,861        |
| 31                    | hCG + hCG-H + hCG-H% + hCGβ + hCGβ% | 1            | 1            | 0,861        |

hCG= hCG determination, hCG-H= hCG-H determination, hCGb= hCGb determination

ChCp = choriocarcinoma pre-therapy, ChCd = choriocarcinoma during therapy, OGCC = ovarian germ cell cancer, TGCT = testicular germ cell cancer,

**BIC** = bladder cancer, **BrC** = breast cancer, **CeC** = cervical cancer, **EnC** = endometrial cancer, **OvC** = ovarian cancer, **VuC** = vulvae cancer
