# Supplementary material for: Glycan Analysis as Biomarkers for Testicular Cancer
Source: MDPI journal article supplement (doi:10.3390/diagnostics9040156), 2019-10-22
Supplement: s1 [file s1]

| Non-trophoblastic cancers |                                     | TGCT vs BIC | TGCT vs BrC | TGCT vs CeC | TGCT vs EnC | TGCT vs OvC | TGCT vs VuC |
|---------------------------|-------------------------------------|-------------|-------------|-------------|-------------|-------------|-------------|
|                           |                                     | AUC         | AUC         | AUC         | AUC         | AUC         | AUC         |
| 1                         | hCG                                 | 1           | 1           | 1           | 1           | 1           | 1           |
| 2                         | hCG-H                               | 1           | 1           | 1           | 1           | 1           | 1           |
| 3                         | hCG-H% (line3 / line2)              | 0,4         | 0,667       | 0,7         | 0,667       | 0,833       | 0,667       |
| 4                         | hCGβ                                | 1           | 1           | 1           | 1           | 1           | 1           |
| 5                         | hCGβ% (line4 / line2)               | 1           | 1           | 1           | 1           | 1           | 1           |
| 6                         | hCG + hCG-H                         | 1           | 1           | 1           | 1           | 1           | 1           |
| 7                         | hCG + hCG-H%                        | 1           | 1           | 1           | 1           | 1           | 1           |
| 8                         | hCG + hCGβ                          | 1           | 1           | 1           | 1           | 1           | 1           |
| 9                         | hCG + hCGβ%                         | 1           | 1           | 1           | 1           | 1           | 1           |
| 10                        | hCG-H + hCG-H%                      | 1           | 1           | 1           | 1           | 1           | 1           |
| 11                        | hCG-H + hCGβ                        | 1           | 1           | 1           | 1           | 1           | 1           |
| 12                        | hCG-H + hCGβ%                       | 1           | 1           | 1           | 1           | 1           | 1           |
| 13                        | hCG-H% + hCGβ                       | 1           | 1           | 1           | 1           | 1           | 1           |
| 14                        | hCG-H% + hCGβ%                      | 1           | 1           | 1           | 1           | 1           | 1           |
| 15                        | hCGβ + hCGβ%                        | 1           | 1           | 1           | 1           | 1           | 1           |
| 16                        | hCG + hCG-H + hCG-H%                | 1           | 1           | 1           | 1           | 1           | 1           |
| 17                        | hCG + hCG-H + hCGβ                  | 1           | 1           | 1           | 1           | 1           | 1           |
| 18                        | hCG + hCG-H + hCGβ%                 | 1           | 1           | 1           | 1           | 1           | 1           |
| 19                        | hCG + hCG-H% + hCGβ                 | 1           | 1           | 1           | 1           | 1           | 1           |
| 20                        | hCG + hCG-H % + hCGb %              | 1           | 1           | 1           | 1           | 1           | 1           |
| 21                        | hCG + hCGβ + hCGβ%                  | 1           | 1           | 1           | 1           | 1           | 1           |
| 22                        | hCG-H + hCG-H% + hCGβ               | 1           | 1           | 1           | 1           | 1           | 1           |
| 23                        | hCG-H + hCG-H% + hCGβ%              | 1           | 1           | 1           | 1           | 1           | 1           |
| 24                        | hCG-H + hCGβ + hCGβ%                | 1           | 1           | 1           | 1           | 1           | 1           |
| 25                        | hCG-H% + hCGβ + hCGβ%               | 1           | 1           | 1           | 1           | 1           | 1           |
| 26                        | hCG + hCG-H + hCG-H% + hCGβ         | 1           | 1           | 1           | 1           | 1           | 1           |
| 27                        | hCG + hCG-H + hCG-H% + hCGβ%        | 1           | 1           | 1           | 1           | 1           | 1           |
| 28                        | hCG + hCG-H + hCGβ + hCGβ%          | 1           | 1           | 1           | 1           | 1           | 1           |
| 29                        | hCG + hCG-H% + hCGβ + hCGβ%         | 1           | 1           | 1           | 1           | 1           | 1           |
| 30                        | hCG-H + hCG-H% + hCGβ + hCGβ%       | 1           | 1           | 1           | 1           | 1           | 1           |
| 31                        | hCG + hCG-H + hCG-H% + hCGβ + hCGβ% | 1           | 1           | 1           | 1           | 1           | 1           |

hCG= hCG determination, hCG-H= hCG-H determination, hCGb= hCGb determination

ChCp = choriocarcinoma pre-therapy, ChCd = choriocarcinoma during therapy, OGCC = ovarian germ cell cancer, TGCT = testicular germ cell cancer,

**BIC** = bladder cancer, **BrC** = breast cancer, **CeC** = cervical cancer, **EnC** = endometrial cancer, **OvC** = ovarian cancer, **VuC** = vulvae cancer
